# Supplementary material for: Luminescence of nanocrystalline BaFCl codoped with Eu2+/3+ and Tb3+
Source: Royal Society of Chemistry journal article supplement (doi:10.1039/d4dt02237h), 2024-01-01
Supplement: d4dt02237h1.pdf [file d4dt02237h1.pdf]

## Electronic Supplementary Information

### Luminescence of Nanocrystalline BaFCl Codoped With Eu<sup>2+/3+</sup> and Tb<sup>3+</sup>

Nishani T. Manamperi, Sachini W. Sivrathne, Alyssa M. Erlenbeck, S. Sameera Perera, and  
Federico A. Rabuffetti\*

Department of Chemistry, Wayne State University, Detroit, MI 48202, USA

\*Corresponding Author. Email: [far@chem.wayne.edu](mailto:far@chem.wayne.edu)

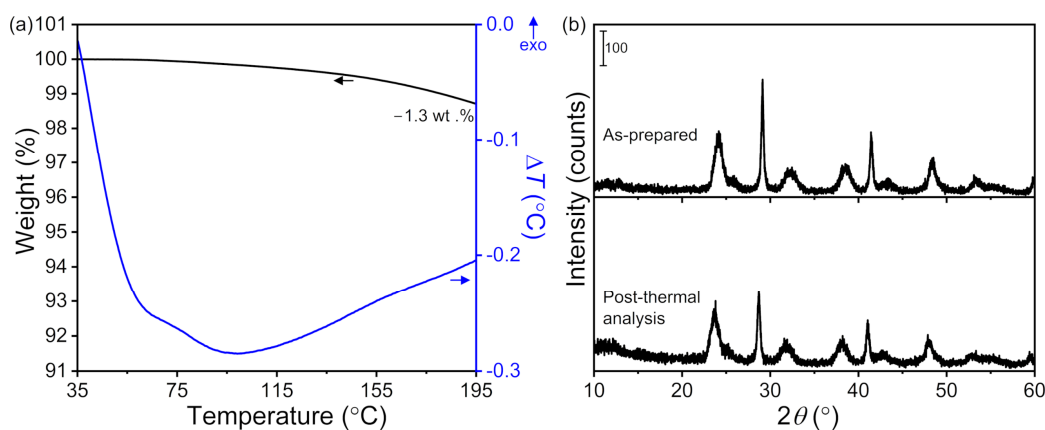

**Figure S1.** (a) Thermogravimetric (TGA) and differential thermal analysis (DTA) of BaFCl:Eu,Tb nanocrystals. Total weight loss is indicated. (b) PXRD patterns of BaFCl:Eu,Tb before and after thermal analysis. Thermal analysis was conducted under flowing nitrogen (100 mL min<sup>-1</sup>) using an SDT2960 TGA–DTA analyzer (TA Instruments).  $\approx$ 10 mg of sample were placed in an alumina crucible, held at 35 °C for 10 min, ramped to 200 °C at a rate of 10 °C min<sup>-1</sup>, and kept at that temperature for 5 min. PXRD patterns were collected in the 10–60°  $2\theta$  range using a step size and time of 0.02° and 0.5 s, respectively.

**Table S1.** Refined Structural Parameters of BaFCl:Eu,Tb Nanocrystals

|                       |                              |
|-----------------------|------------------------------|
| $a$ (Å)               | 4.3857(3)                    |
| $c$ (Å)               | 7.2505(15)                   |
| $V$ (Å <sup>3</sup> ) | 139.46(4)                    |
| $z_{\text{Ba}}$       | 0.2087(3)                    |
| $z_{\text{Cl}}$       | 0.6328(8)                    |
| $U_{\text{Ba}}^a$     | 0.39(9)                      |
| $U_{\text{F}}^a$      | 1.2(3)                       |
| $U_{\text{Cl}}^a$     | 0.77(19)                     |
| Ba–F (Å)              | 2.6644(10)                   |
| Ba–Cl (Å)             | 3.307(3) (×4), 3.075(7) (×1) |

<sup>a</sup> Given as  $100 \times U$ .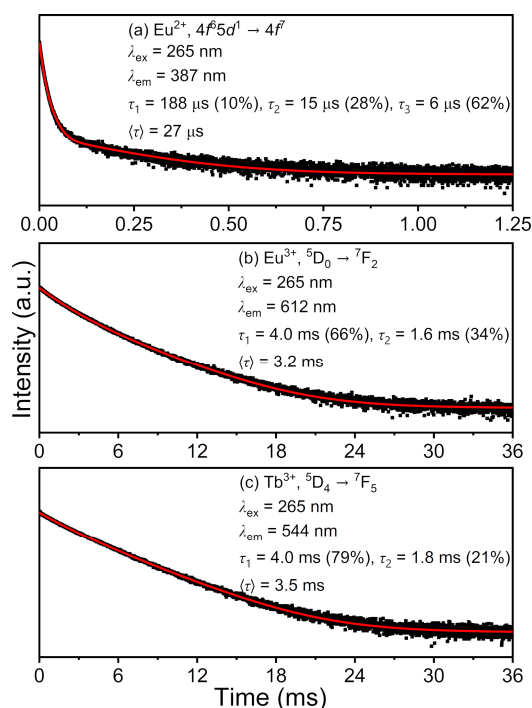**Figure S2.** Multiexponential fits of room-temperature luminescence decays of  $\text{Eu}^{2+}$  (a),  $\text{Eu}^{3+}$  (b), and  $\text{Tb}^{3+}$  (c) in BaFCl:Eu,Tb nanocrystals. Fits are depicted as solid red lines. Plots are shown in logarithmic scale. The longest component obtained in the decay of  $\text{Eu}^{2+}$  (188  $\mu\text{s}$ , 10% fractional contribution) likely arises from a slow decaying background associated with chemical species other than  $\text{Eu}^{2+}$  (e.g., host emission).

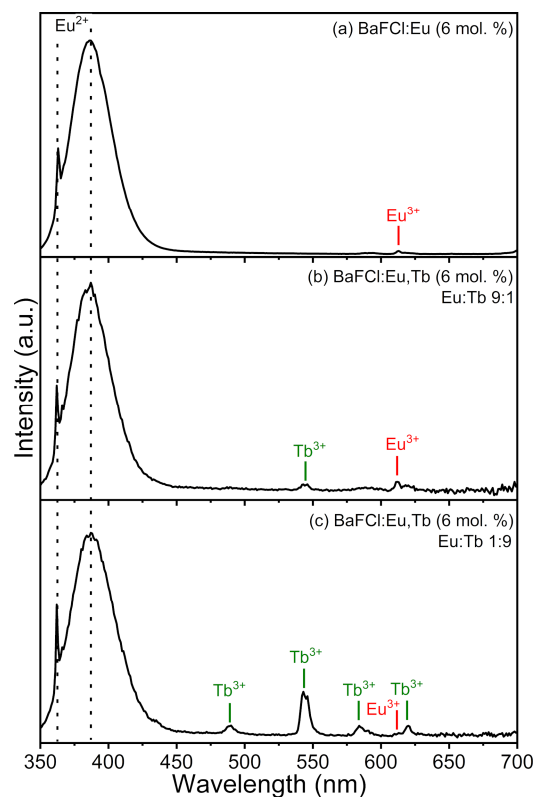

**Figure S3.** Room-temperature emission spectrum of (a) singly-doped BaFCl:Eu nanocrystals, and (b,c) BaFCl:Eu,Tb nanocrystals codoped with different Eu:Tb ratios (6 mol. % total rare-earth concentration).  $\text{Eu}^{2+}$  emission bands are indicated with dotted lines. Spectra were collected under 275 nm excitation.

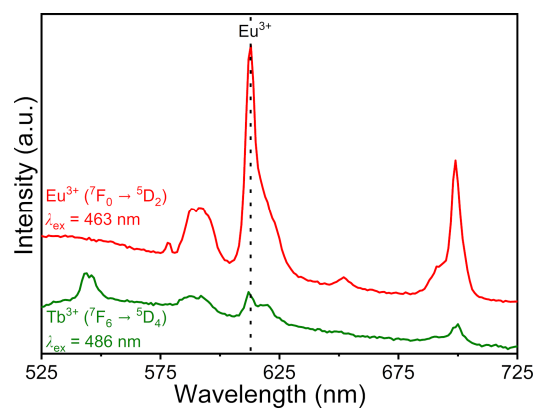

**Figure S4.** Room-temperature emission spectra of BaFCl:Eu,Tb nanocrystals collected upon direct excitation of  $\text{Eu}^{3+}$  (red curve) and  $\text{Tb}^{3+}$  (green curve).  $\text{Eu}^{3+}$  emission at 612 nm is observed in both cases.

**Table S2.** Peak Intensities for Calculation of Peak-Intensity-Weighted  $\text{Eu}^{2+}$  Centroid<sup>a,b</sup>

| Temperature (K) | $I_{f \rightarrow f}^{\tilde{\nu}_1}$ | $I_{f \rightarrow f}^{\tilde{\nu}_2}$ |
|-----------------|---------------------------------------|---------------------------------------|
| 80              | 2.92334                               | 0.4407                                |
| 130             | 2.18397                               | 0.72453                               |
| 180             | 1.14993                               | 0.84889                               |
| 230             | 0.72655                               | 1                                     |
| 280             | 0.46059                               | 0.84923                               |
| 330             | 0.40594                               | 0.84923                               |
| 380             | 0.34539                               | 0.74659                               |
| 430             | 0.31579                               | 0.67706                               |

<sup>a</sup> Normalized with respect to  $I_{f \rightarrow f}^{\tilde{\nu}_2}$  (230 K).

<sup>b</sup>  $\tilde{\nu}_1 = 27548 \text{ cm}^{-1}$  (363 nm) and  $\tilde{\nu}_2 = 25774 \text{ cm}^{-1}$  (388 nm).

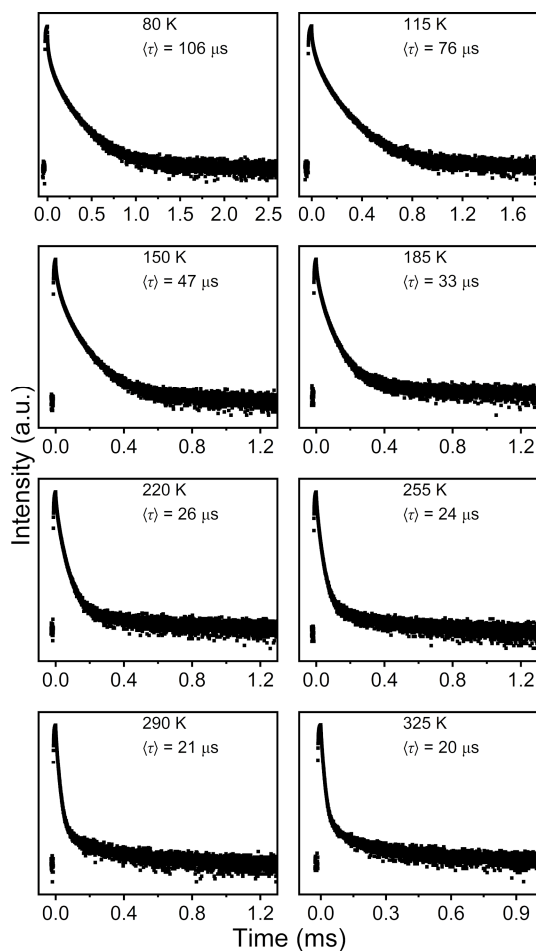

**Figure S5.** Variable-temperature luminescence decays of  $\text{Eu}^{2+}$  in  $\text{BaFCl}:\text{Eu},\text{Tb}$  nanocrystals. Decays were excited at 265 nm and monitored at 387 nm. Intensity-weighted average lifetimes ( $\langle\tau\rangle$ ) are given. Decays are plotted in logarithmic scale.
